# Supplementary material for: GADD45β Inhibits Hepatic Lipogenesis through the AMPK/SREBP1 Pathway via Reducing the ubiquitination-mediated Degradation of SIRT1
Source: Research Square preprint supplement (doi:10.21203/rs.3.rs-6769255/v1), 2025-06-27

## Supplementary information files

**Fig 1 D**

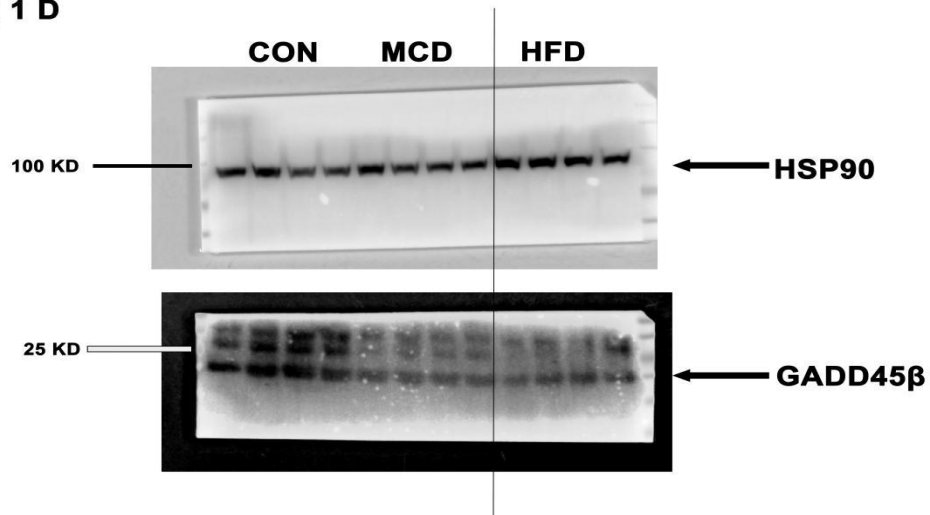

**Fig 2 B**

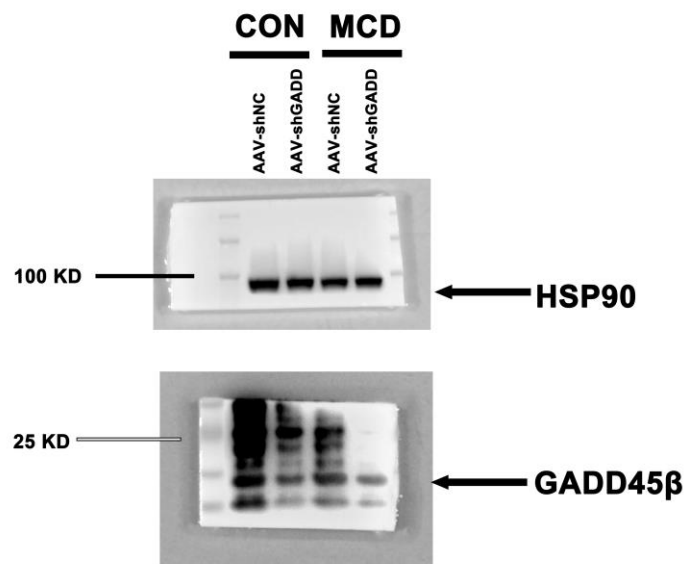

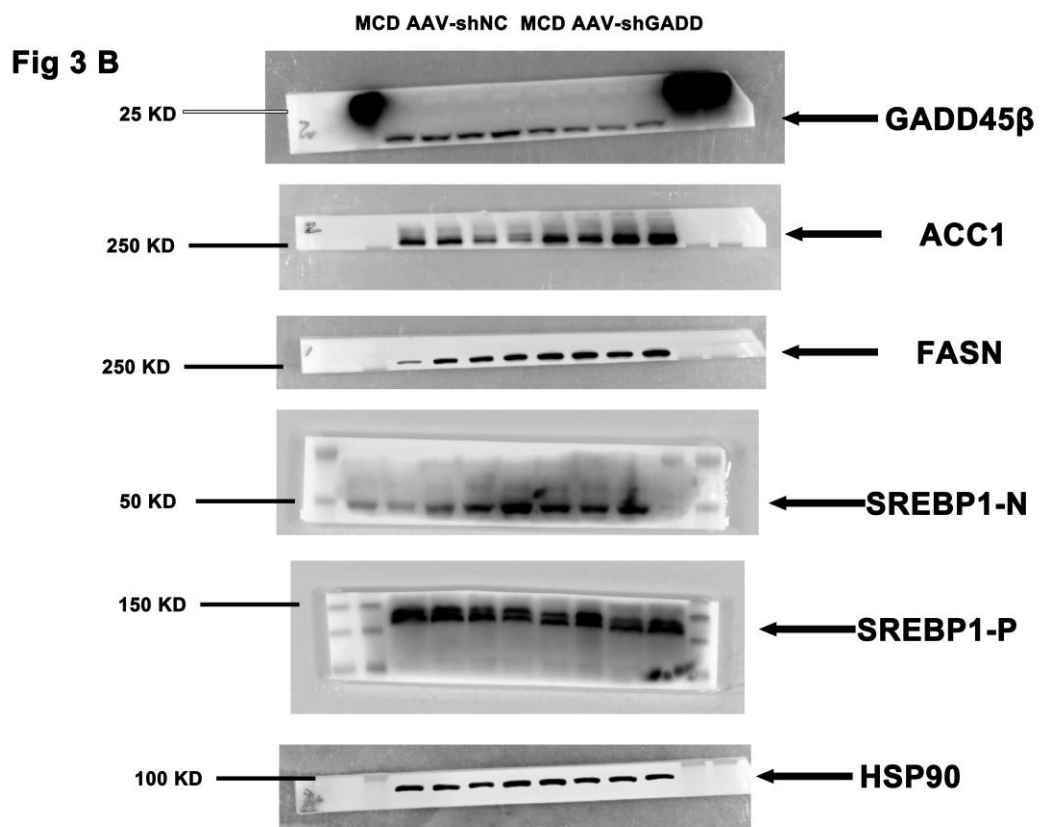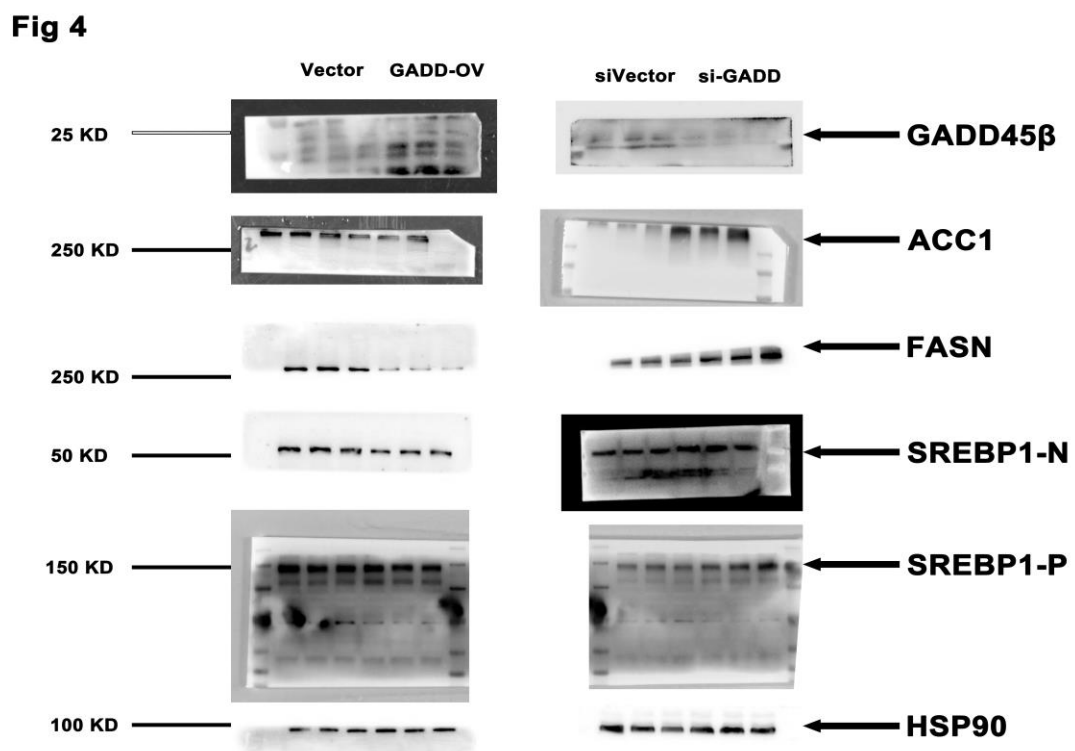

Western blot analysis showing protein levels of GADD45 $\beta$ , pAMPK, AMPK, SIRT1, and HSP90 in MCD AAV-shNC, MCD AAV-shGADD, siVector, si-GADD, Vector, and GADD-OV groups. The blots are arranged in a grid with molecular weight markers on the left (25 KD, 75 KD, 150 KD, 100 KD) and protein names on the right. GADD45 $\beta$  and pAMPK are detected in the top row, AMPK in the second row, SIRT1 in the third row, and HSP90 in the bottom row. The blots show that GADD45 $\beta$  and pAMPK levels are significantly increased in the MCD AAV-shGADD, si-GADD, and GADD-OV groups compared to the control groups. AMPK levels are also increased in the MCD AAV-shGADD, si-GADD, and GADD-OV groups. SIRT1 levels are decreased in the MCD AAV-shGADD, si-GADD, and GADD-OV groups. HSP90 levels are used as a loading control and are consistent across all groups.

**Fig 5-2**

The figure displays multiple Western blots arranged in two main sections. The top section shows blots for SIRT1 (150 KD), pAMPK (75 KD), AMPK (75 KD), and βactin (40 KD). The bottom section shows blots for GADD45β (25 KD), SREBP1-N (50 KD), HSP90 (100 KD), GADD45α (25 KD), pAMPK (75 KD), AMPK (75 KD), SREBP1-N (50 KD), and HSP90 (100 KD). Molecular weight markers are indicated on the left of each blot. Arrows point from labels to specific bands.

**Fig 6**

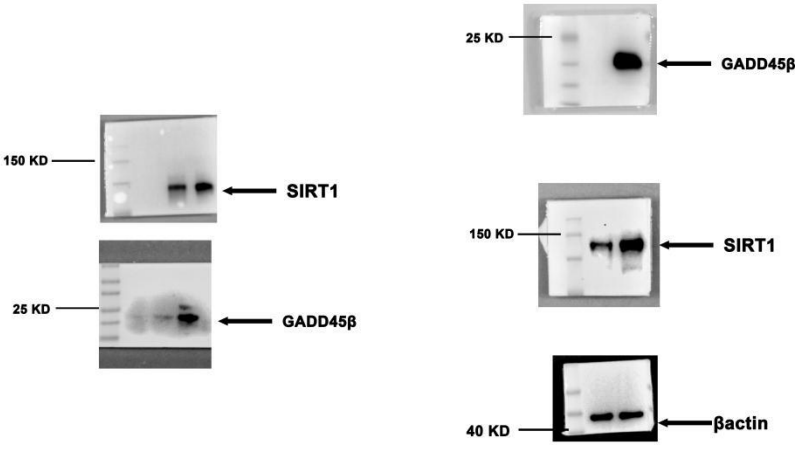

**Fig 7**

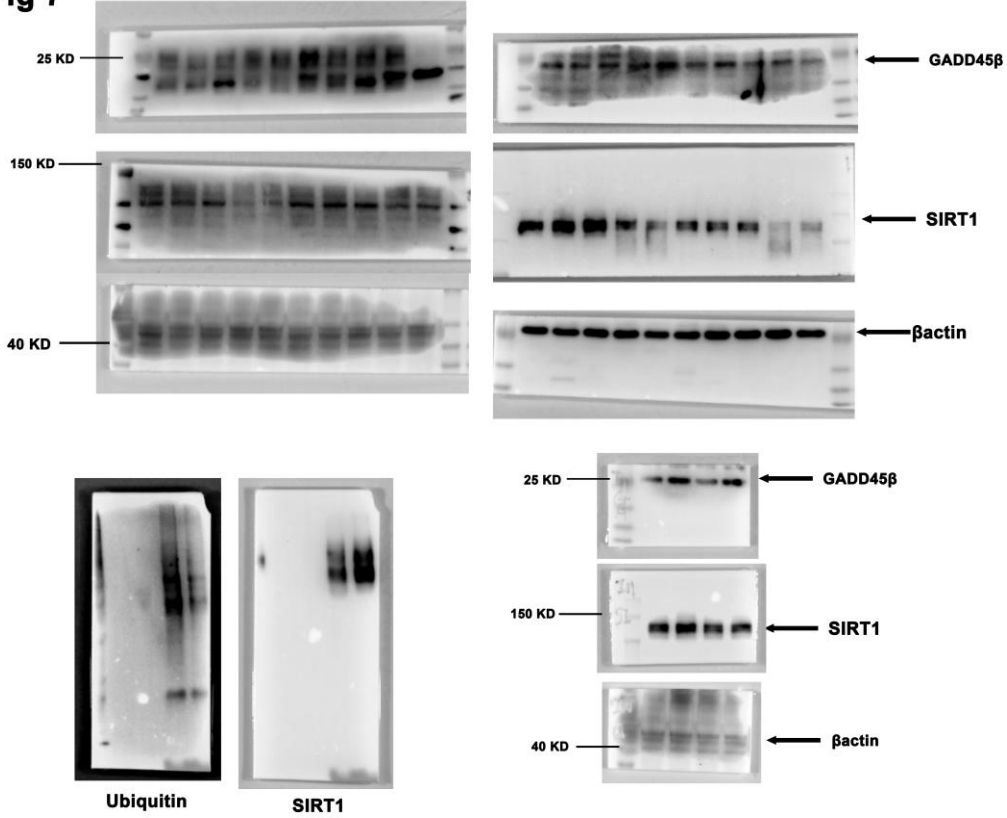

Supplement: Supplementary file 1 [file a20d75c129946cf0b8982d03.pdf]
